# Supplementary material for: Concordance of immunological events between intrarectal and intravenous SHIVAD8-EO infection when assessed by Fiebig-equivalent staging
Source: JCI journal article supplement (doi:10.1172/jci151632), 2021-08-31
Supplement: sd1 [file 1]

Supplemental Materials for:

**Concordance of immunological events between intrarectal and intravenous SHIV<sub>AD8-EO</sub> infection when assessed by Fiebig-equivalent staging**

Joana Dias<sup>1</sup>, Giulia Fabozzi<sup>2</sup>, Kylie March<sup>2</sup>, Mangaiarkarasi Asokan<sup>3</sup>, Cassandra G. Almasri<sup>3</sup>, Jonathan Fintzi<sup>4</sup>, Wanwisa Promsote<sup>1</sup>, Yoshiaki Nishimura<sup>5</sup>, John-Paul Todd<sup>6</sup>, Jeffrey D. Lifson<sup>7</sup>, Malcolm A. Martin<sup>5</sup>, Lucio Gama<sup>1</sup>, Constantinos Petrovas<sup>2</sup>, Amarendra Pegu<sup>3</sup>, John R. Mascola<sup>3</sup>, and Richard A. Koup<sup>1\*</sup>

\*Corresponding author:

Richard A. Koup

40 Convent Drive

Vaccine Research Center

National Institutes of Health

Bethesda, MD 20892, USA

Tel: +1 301-594-8585

Email: rkoup@mail.nih.gov

## SUPPLEMENTAL FIGURES

**A**

| Timepoint (pc)        | D0 | D3 | D7 | D10 | D14 | D17 | wk3 | wk4 | wk5 | wk6 | wk7 | wk8 | wk12 | wk16 | wk20 |
|-----------------------|----|----|----|-----|-----|-----|-----|-----|-----|-----|-----|-----|------|------|------|
| Intrarectal challenge |    |    |    |     |     |     |     |     |     |     |     |     |      |      |      |
| HH7                   | -  | -  | -  | -   | +   | +   | +   | +   | +   | +   | +   | +   | +    | +    | +    |
| DGEM                  | -  | -  | +  | +   | +   | +   | +   | +   | +   | +   | +   | +   | +    | +    | +    |
| HZ2                   | -  | -  | -  | +   | +   | +   | +   | +   | +   | +   | +   | +   | +    | +    | +    |
| DGAM                  | -  | -  | +  | +   | +   | +   | +   | +   | +   | +   | +   | +   | +    | +    | +    |
| HR8                   | -  | -  | +  | +   | +   | +   | +   | +   | +   | +   | +   | +   | +    | +    | +    |
| DG81                  | -  | -  | -  | -   | -   | -   | -   | -   | -   | -   | -   | -   | -    | -    | -    |
| Intravenous challenge |    |    |    |     |     |     |     |     |     |     |     |     |      |      |      |
| DG63                  | -  | +  | +  | +   | +   | +   | +   | +   | +   | +   | +   | +   | +    | +    | +    |
| DGBH                  | -  | +  | +  | +   | +   | +   | +   | +   | +   | +   | +   | +   | +    | +    | +    |
| DGGL                  | -  | +  | +  | +   | +   | +   | +   | +   | +   | +   | +   | +   | +    | +    | +    |
| HEM                   | -  | +  | +  | +   | +   | +   | +   | +   | +   | +   | +   | +   | +    | +    | +    |
| HPZ                   | -  | +  | +  | +   | +   | +   | +   | +   | +   | +   | +   | +   | +    | +    | +    |
| HVL                   | -  | +  | +  | +   | +   | +   | +   | +   | +   | +   | +   | +   | +    | +    | +    |

**B**

| Timepoint (pc)        | D0 | D3 | D7 | D10 | D14 | D17 | wk3 | wk4 | wk5 | wk6 | wk7 | wk8 | wk12 | wk16 | wk20 |
|-----------------------|----|----|----|-----|-----|-----|-----|-----|-----|-----|-----|-----|------|------|------|
| Intrarectal challenge |    |    |    |     |     |     |     |     |     |     |     |     |      |      |      |
| HH7                   | -  | -  | -  | -   | -   | -   | +   | +   | -   | -   | -   | -   | -    | -    | -    |
| DGEM                  | -  | -  | -  | -   | +   | +   | +   | -   | -   | -   | -   | -   | -    | -    | -    |
| HZ2                   | -  | -  | -  | -   | -   | +   | +   | +   | -   | -   | -   | -   | -    | -    | -    |
| DGAM                  | -  | -  | -  | -   | +   | +   | -   | -   | -   | -   | -   | -   | -    | -    | -    |
| HR8                   | -  | -  | -  | -   | +   | +   | +   | -   | -   | -   | -   | -   | -    | -    | -    |
| DG81                  | -  | -  | -  | -   | -   | -   | -   | -   | -   | -   | -   | -   | -    | -    | -    |
| Intravenous challenge |    |    |    |     |     |     |     |     |     |     |     |     |      |      |      |
| DG63                  | -  | -  | -  | +   | +   | +   | -   | -   | -   | -   | -   | -   | -    | -    | -    |
| DGBH                  | -  | -  | -  | +   | +   | +   | -   | -   | -   | -   | -   | -   | -    | -    | -    |
| DGGL                  | -  | -  | +  | +   | +   | +   | +   | +   | +   | +   | +   | +   | -    | +    | -    |
| HEM                   | -  | -  | -  | +   | +   | +   | +   | -   | -   | -   | -   | -   | -    | -    | -    |
| HPZ                   | -  | -  | -  | +   | +   | +   | +   | -   | -   | -   | +   | +   | -    | -    | -    |
| HVL                   | -  | -  | -  | +   | +   | +   | +   | -   | -   | -   | -   | -   | -    | -    | -    |

**C**

| Timepoint (pc)        | D0 | D3 | D7 | D10 | D14 | D17 | wk3 | wk4 | wk5 | wk6 | wk7 | wk8 | wk12 | wk16 | wk20 |
|-----------------------|----|----|----|-----|-----|-----|-----|-----|-----|-----|-----|-----|------|------|------|
| Intrarectal challenge |    |    |    |     |     |     |     |     |     |     |     |     |      |      |      |
| HH7                   | -  | -  | -  | -   | -   | -   | -   | +   | +   | +   | +   | +   | +    | +    | +    |
| DGEM                  | -  | -  | -  | -   | -   | +   | +   | +   | +   | +   | +   | +   | +    | +    | +    |
| HZ2                   | -  | -  | -  | -   | -   | -   | +   | +   | +   | +   | +   | +   | +    | +    | +    |
| DGAM                  | -  | -  | -  | -   | -   | -   | +   | +   | +   | +   | +   | +   | +    | +    | +    |
| HR8                   | -  | -  | -  | -   | -   | +   | +   | +   | +   | +   | +   | +   | +    | +    | +    |
| DG81                  | -  | -  | -  | -   | -   | -   | -   | -   | -   | -   | -   | -   | +    | +    | -    |
| Intravenous challenge |    |    |    |     |     |     |     |     |     |     |     |     |      |      |      |
| DG63                  | -  | -  | -  | -   | -   | +   | +   | +   | +   | +   | +   | +   | +    | +    | +    |
| DGBH                  | -  | -  | -  | -   | -   | +   | +   | +   | +   | +   | +   | +   | +    | +    | +    |
| DGGL                  | -  | -  | -  | -   | -   | +   | +   | +   | +   | +   | +   | +   | +    | +    | +    |
| HEM                   | -  | -  | -  | -   | -   | +   | +   | +   | +   | +   | +   | +   | +    | +    | +    |
| HPZ                   | -  | -  | -  | -   | -   | +   | +   | +   | +   | +   | +   | +   | +    | +    | +    |
| HVL                   | -  | -  | -  | -   | +   | +   | +   | +   | +   | +   | +   | +   | +    | +    | +    |

**Supplemental Figure 1. Patterns of viral marker detection throughout SHIV<sub>AD8-EO</sub> infection.** Detection of plasma (A) SIV Gag RNA, (B) SIV p27 antigen, and (C) HIV-1/HIV-2 antibodies during the course of SHIV<sub>AD8-EO</sub> infection. The symbols “+” and “-” denote detection and absence of detection, respectively, of the corresponding viral markers. D, day; N.D., not determined; pc, post-challenge; wk, week.

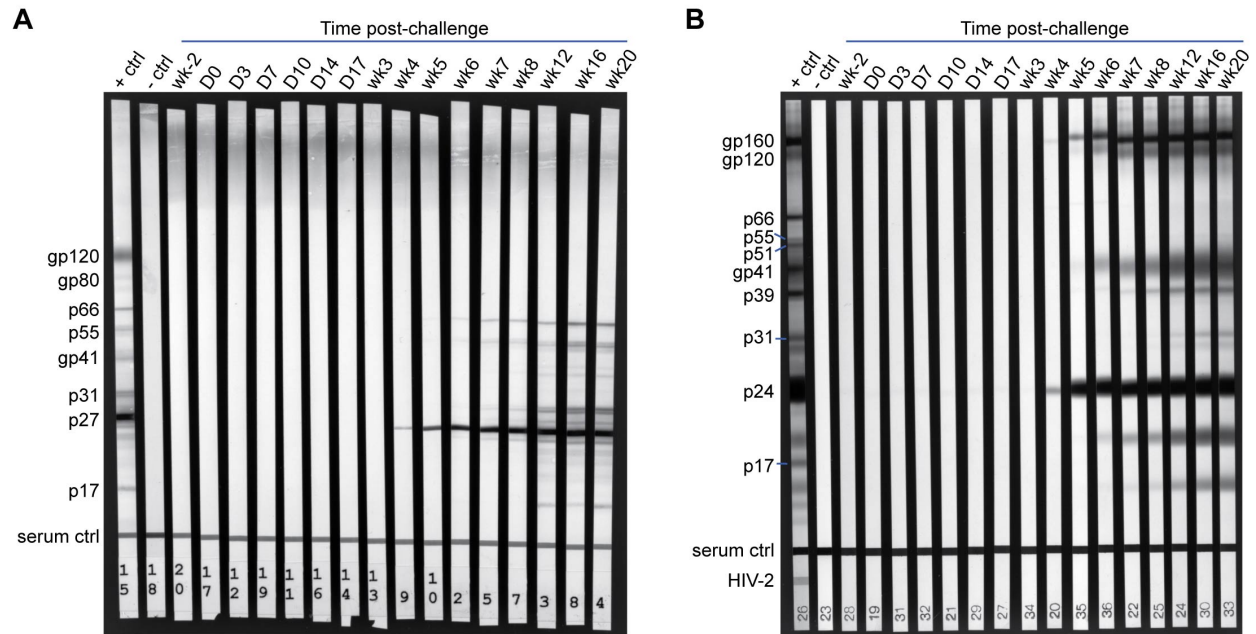

**Supplemental Figure 2. Western blot assays for detection of SIV and HIV antibodies.** Representative example of the western blots for detection of antibodies against (A) SIV antigens and (B) HIV antigens in the plasma of SHIV<sub>AD8-EO</sub>-challenged monkeys. The SIV western blot was used to detect antibodies against the Gag and Pol antigens (p17, p27, p31, p55, and p66), whereas the HIV western blot was used to detect antibodies against the Env antigens (gp41, gp120, and gp160). Positive and negative control samples provided by each of the western blot kits are also illustrated. ctrl, control; D, day; wk, week.

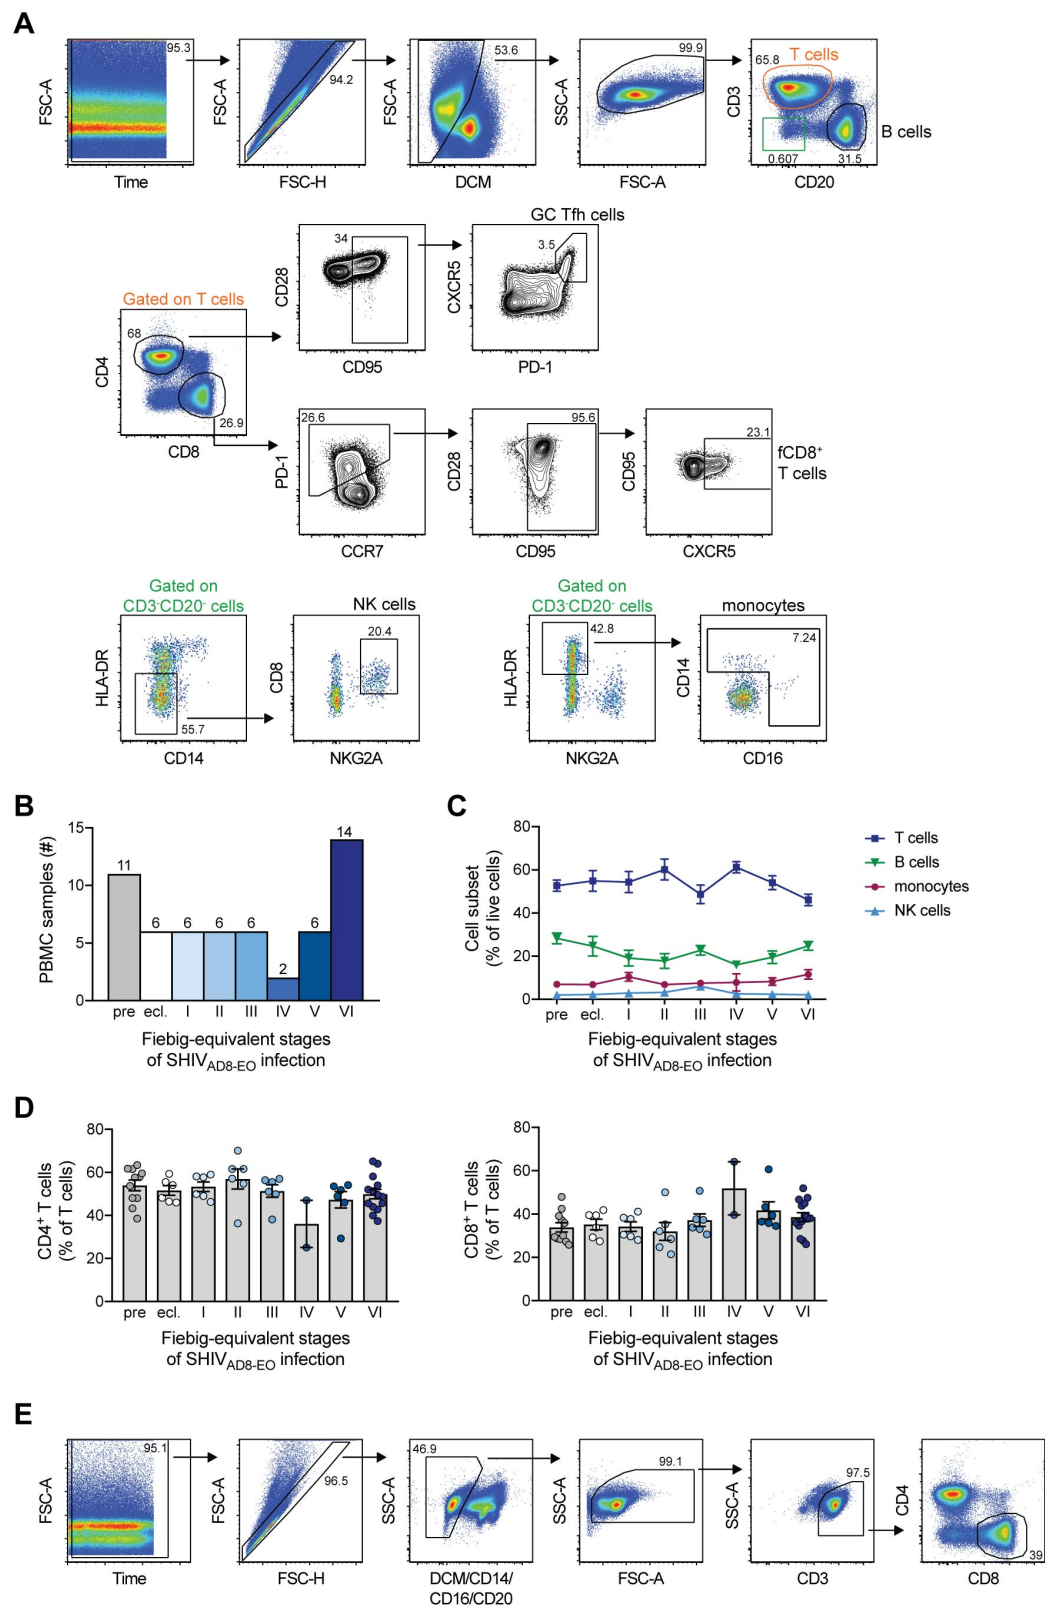

**Supplemental Figure 3. Flow cytometry identification of LN cell populations and immunophenotyping of PBMCs. (A)** Gating strategy to identify T cells, B cells, NK cells, and

monocytes, as well as CD4<sup>+</sup> and CD8<sup>+</sup> T cell subsets, by flow cytometry in the LNs of SHIV<sub>AD8-EO</sub>-challenged monkeys. **(B)** Distribution of PBMC samples for flow cytometry immunophenotyping analysis across the Fiebig-equivalent stages of SHIV<sub>AD8-EO</sub> infection. Frequency of **(C)** monocytes, NK cells, B cells, and T cells, and of **(D)** CD4<sup>+</sup> (*left*) and CD8<sup>+</sup> (*right*) T cells at the different stages of SHIV<sub>AD8-EO</sub> infection. **(E)** Gating strategy to identify LN CD8<sup>+</sup> T cells from SHIV<sub>AD8-EO</sub>-challenged monkeys for flow cytometry analysis of CD8<sup>+</sup> T cell responses to 6 h stimulation with SIV Gag peptide pool. Graphs show the absolute number **(B)**, the mean  $\pm$  SEM **(C)**, and the mean  $\pm$  SEM and individual datapoints **(D)**. The Kruskal-Wallis test followed by Dunn's multiple comparisons test was used to detect significant differences between all stages except for Fiebig-equivalent stage IV (low *n*) **(C-D)**. DCM, dead cell marker; ecl., eclipse; fCD8<sup>+</sup>, follicular CD8<sup>+</sup>; GC, germinal center; LN, lymph node; NK, natural killer; Tfh, T follicular helper.

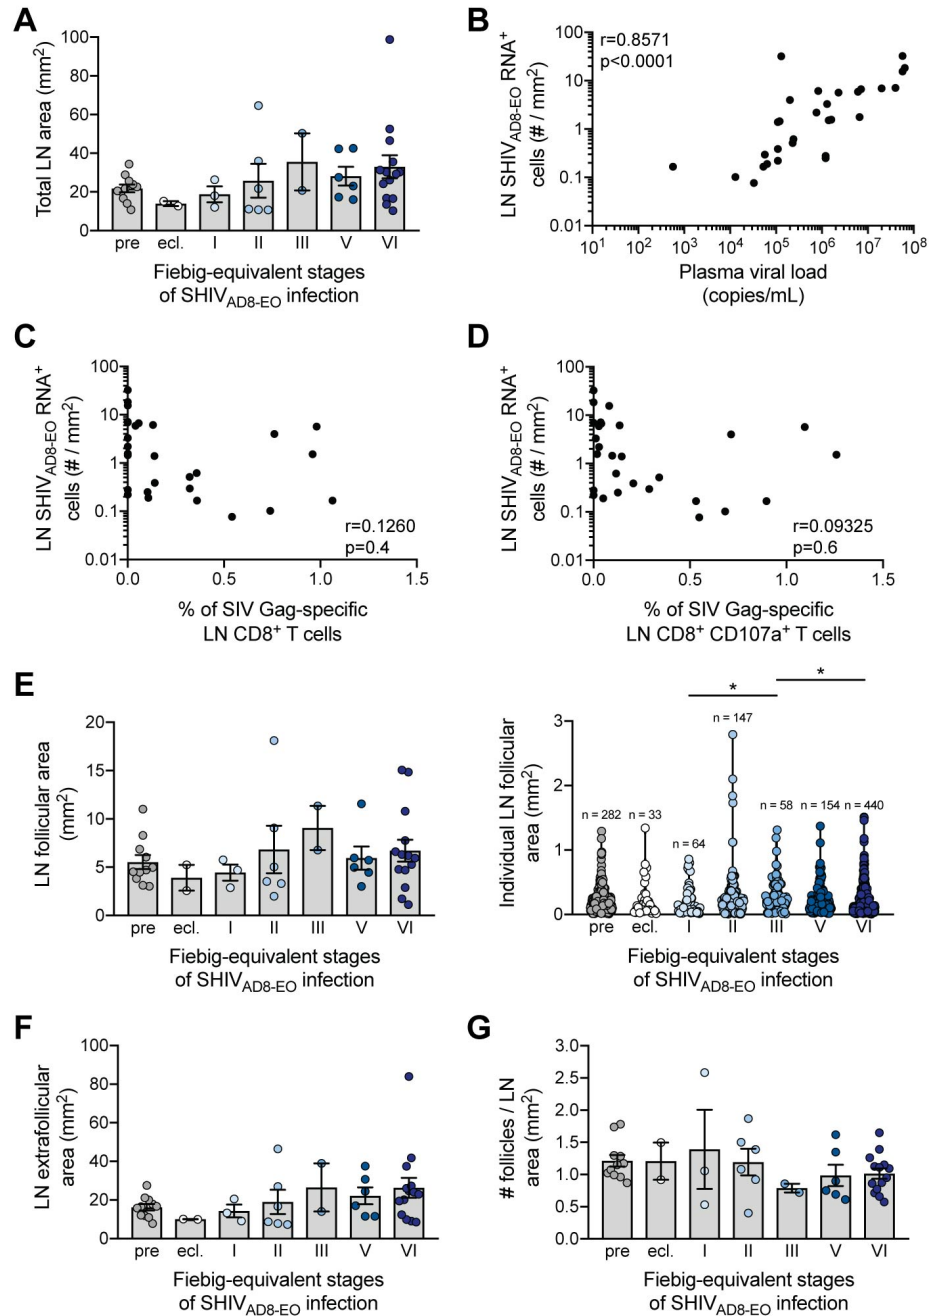

**Supplemental Figure 4. Size of LN sections as determined by RNAscope *in situ* hybridization.**

(A) Size of whole LN sections in each stage of SHIV<sub>AD8-EO</sub> infection. Correlations between the number of SHIV<sub>AD8-EO</sub> RNA<sup>+</sup> cells per mm<sup>2</sup> of LN and either (B) plasma viral load, (C) frequency of SIV Gag-specific LN CD8<sup>+</sup> T cells co-expressing CD69 and IFN $\gamma$ , MIP-1 $\beta$ , or TNF, or expressing CD107a, or (D) frequency of SIV Gag-specific LN CD8<sup>+</sup> T cells expressing CD107a. (E) Size of combined follicles per LN section (*left*) or of individual LN follicles (*right*) in each stage of SHIV<sub>AD8-EO</sub> infection. (F) Size of the extrafollicular area in each stage of SHIV<sub>AD8-EO</sub> infection. (G) Number of follicles per mm<sup>2</sup> of LN in each stage of SHIV<sub>AD8-EO</sub> infection. Bar graphs show the mean  $\pm$  SEM and individual datapoints (A, E *left*, F, and G). The Kruskal-Wallis

test followed by Dunn's multiple comparisons test was used to detect significant differences between the pre-challenge phase, Fiebig-equivalent stage II, V, and VI of SHIV<sub>AD8-EO</sub> infection (**A, E *left*, F, and G**), or between all stages (**E *right***). The Spearman's rank correlation test was used for correlation analyses (**B-D**). ecl., eclipse; LN, lymph node.

## SUPPLEMENTAL TABLES

**Supplemental Table 1. Laboratory assays to identify the Fiebig-equivalent stages of SHIV<sub>AD8-EO</sub> infection**

| <b>Fiebig stages of HIV-1 infection<sup>A</sup></b> | <b>Fiebig-equivalent stages of SHIV<sub>AD8-EO</sub> infection</b> |
|-----------------------------------------------------|--------------------------------------------------------------------|
| Quantitative HIV-1 RNA PCR                          | Quantitative SIV Gag RNA RT-PCR                                    |
| HIV-1 p24 ELISA                                     | SIV p27 ELISA                                                      |
| HIV-1/HIV-2 antibody ELISA (IgM-sensitive)          | HIV-1/HIV-2 antibody ELISA (IgM-sensitive)                         |
| HIV western blot                                    | SIV western blot & HIV western blot                                |

<sup>A</sup>E. W. Fiebig, D. J. Wright, B. D. Rawal, P. E. Garrett, R. T. Schumacher, L. Peddada, C. Heldebrant, R. Smith, A.

Conrad, S. H. Kleinman, M. P. Busch, Dynamics of HIV viremia and antibody seroconversion in plasma donors: implications for diagnosis and staging of primary HIV infection. *AIDS* **17**, 1871-1879 (2003).



**Supplemental Table 2. Antibodies used in flow cytometry**

| <b>Marker</b> | <b>Fluorochrome</b> | <b>Clone</b> | <b>Supplier</b>      |
|---------------|---------------------|--------------|----------------------|
| CCR7          | AF700               | 150503       | BD Biosciences       |
| CD3           | APC-Cy7             | SP34-2       | BD Biosciences       |
| CD4           | BUV661              | SK3          | BD Biosciences       |
| CD8           | BV570               | RPA-T8       | Biolegend            |
| CD14          | BV510               | M5E2         | Biolegend            |
| CD16          | BUV496              | 3G8          | BD Biosciences       |
| CD16          | BV510               | 3G8          | Biolegend            |
| CD20          | BUV737              | 2H7          | BD Biosciences       |
| CD20          | BV510               | 2H7          | Biolegend            |
| CD28          | ECD                 | CD28.2       | Beckman Coulter      |
| CD69          | BV605               | FN50         | Biolegend            |
| CD95          | PECy5               | DX2          | BD Biosciences       |
| CD107a        | BV650               | H4A3         | Biolegend            |
| CXCR5         | PECy7               | MU5UBEE      | eBioscience          |
| DCM           | Zombie UV           | -            | Biolegend            |
| DCM           | Aqua                | -            | Invitrogen           |
| HLA-DR        | PECy5.5             | TU36         | Life Technologies    |
| IFN $\gamma$  | FITC                | B27          | BD Biosciences       |
| MIP-1 $\beta$ | PE                  | D21-1351     | BD Biosciences       |
| NKG2A         | APC                 | REA110       | MACS Miltenyi Biotec |
| PD-1          | BV711               | EH12.2H7     | Biolegend            |
| TNF           | BV785               | Mab11        | Biolegend            |
